# Supplementary material for: Characterization of Atherosclerotic Mice Reveals a Sex-Dependent Susceptibility to Plaque Calcification but No Major Changes in the Lymphatics in the Arterial Wall
Source: MDPI journal article supplement (doi:10.3390/ijms25074046), 2024-04-05
Supplement: s1 [file s1]

# Characterization of Atherosclerotic Mice Reveals a Sex-Dependent Susceptibility to Plaque Calcification but No Major Changes in the Lymphatics in the Arterial Wall

Carolín Christ<sup>1</sup>, Zsombor Ocskay<sup>1</sup>, Gábor Kovács<sup>1</sup> and Zoltán Jakus<sup>1\*</sup>

<sup>1</sup> Department of Physiology, Semmelweis University School of Medicine, Budapest, Hungary

\* Correspondence: jakus.zoltan@semmelweis.hu; Tel.: +36-1-4591500 x60429

## Supplementary Material

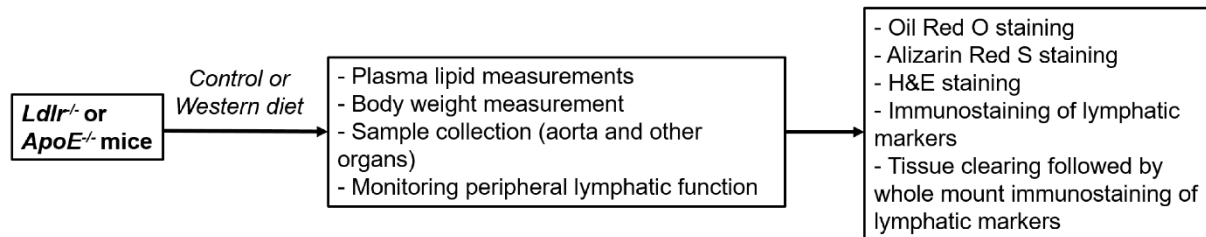

**Supplementary Figure S1.** Experimental setup. *Ldlr*<sup>-/-</sup> and *ApoE*<sup>-/-</sup> mice were fed a control or Western diet for 20-30 weeks after which plasma lipids, body weight and peripheral lymphatic function were measured. Aorta of both *Ldlr*<sup>-/-</sup> and *ApoE*<sup>-/-</sup> mice on control and Western diet were collected, followed by Oil Red O staining, Alizarin Red S staining, H&E staining, immunostaining of lymphatic markers, tissue clearing and whole mount immunostaining of lymphatic markers.

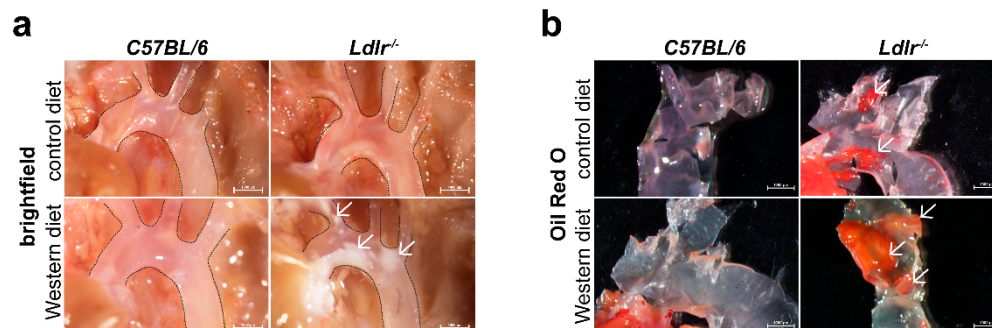

**Supplementary Figure S2.** Comparison of plaque development in *C57BL/6* wild-type and *Ldlr*<sup>-/-</sup> mice. **a)** Brightfield images of the aortic arch of female *C57BL/6* wild-type and *Ldlr*<sup>-/-</sup> mice in situ after 20 weeks on control or Western diet. Images were acquired by stereo microscopy, scale bar = 1000  $\mu$ m; n = 3 aortas of 3 mice per group. Arrows indicate plaque formation in the aortic arch. **b)** Oil Red O staining of whole aortas of female *C57BL/6* and *Ldlr*<sup>-/-</sup> mice after 20 weeks on control or western diet. Arrows indicate lipid deposition in the aortic arch. Images were acquired by stereo microscopy, scale bar = 1000  $\mu$ m; n = 3 aortas of 3 mice per group.
